# Supplementary material for: Ni, beyond thermodynamic tuning, maintains the catalytic activity of V species in Ni3(VO4)2 doped MgH2
Source: Royal Society of Chemistry journal article supplement (doi:10.1039/d0ta12079k), 2021-01-01
Supplement: d0ta12079k1.pdf [file d0ta12079k1.pdf]

Electronic Supplementary Material (ESI) for Journal of Materials Chemistry A. This journal is © The Royal Society of Chemistry 2020

## Supplementary Information

### **Ni, Beyond Thermodynamic Tuning, Maintains the Catalytic Activity of V Species in Ni<sub>3</sub>(VO<sub>4</sub>)<sub>2</sub> Doped MgH<sub>2</sub>**

*Jiahe Zang,<sup>a</sup> Shaofei Wang,<sup>bcd</sup> Rongrun Hu,<sup>a</sup> Han Man,<sup>a</sup> Jichao Zhang,<sup>e</sup> Fei Wang,<sup>a</sup> Dalin Sun,<sup>a</sup> Yun Song,<sup>a,\*</sup> Fang Fang<sup>a,\*</sup>*

<sup>a</sup> Department of Materials Science, Fudan University, Shanghai, 200433, PR China

<sup>b</sup> Institute of High Energy Physics, Chinese Academy of Sciences (CAS), Beijing 100049, China

<sup>c</sup> Spallation Neutron Source Science Center, Dongguan, 523808, China

<sup>d</sup> School of Nuclear Sciences and Technology, University of Chinese Academy of Sciences, Beijing, 100049, China

<sup>e</sup> Shanghai Synchrotron Radiation Facility, Zhangjiang Laboratory, Shanghai Advanced Research Institute, Chinese Academy of Sciences, Shanghai, 201204, PR China

\*Corresponding author at: Department of Materials Science, Fudan University, Shanghai 200433 (P. R. China)

E-mail addresses: songyun@fudan.edu.cn; f\_fang@fudan.edu.cn.

## **Content:**

**Table S1.** Structural parameters and phase abundance for as-prepared  $\text{Ni}_3(\text{VO}_4)_2$ .

**Table S2.** Atomic coordinates, occupation factors and isotropic thermal parameters of  $\text{Ni}_3(\text{VO}_4)_2$ .

**Fig. S1.** Electron diffraction patterns of  $\text{Ni}_3(\text{VO}_4)_2$ .

**Fig. S2.** XRD patterns of  $\text{MgH}_2\text{-Ni}_3(\text{VO}_4)_2$  and pure  $\text{MgH}_2$  after ball-milling.

**Equation S1.** and **Equation S2.** Van't Hoff equation and Kissinger's equation.

**Fig. S3.** TG curves of  $\text{MgH}_2\text{-Ni}_3(\text{VO}_4)_2$  sample at different heating rates.

**Fig. S4.** DSC curves of ball-milled  $\text{MgH}_2$  at different heating rates.

**Fig. S5.** (a-b) SEM, EDS mapping of (c) Mg, (d) Ni, (e) V and (f) O for dehydrogenated  $\text{MgH}_2\text{-Ni}_3(\text{VO}_4)_2$  sample.

**Fig. S6.** Schematic diagram of the crystal structure of  $\text{MgH}_2$ .

**Fig. S7.** DOS of  $\text{V}_2\text{O}_3$  (001) crystal plane and  $\text{Mg}_2\text{Ni}$  doped  $\text{V}_2\text{O}_3$ .

**Table S1-S2****Table S1** Structural parameters and phase abundance for as-prepared Ni<sub>3</sub>(VO<sub>4</sub>)<sub>2</sub>.

| Sample                                                         | Space Group | Lattice parameters (Å) |            |           | Abundance |
|----------------------------------------------------------------|-------------|------------------------|------------|-----------|-----------|
|                                                                |             | <i>a</i>               | <i>b</i>   | <i>c</i>  |           |
| as-prepared<br>Ni <sub>3</sub> (VO <sub>4</sub> ) <sub>2</sub> | <i>Cmca</i> | 6.0157(2)              | 11.4295(1) | 8.4315(5) | 100 wt%   |

**Table S2** Atomic coordinates, occupation factors and isotropic thermal parameters of Ni<sub>3</sub>(VO<sub>4</sub>)<sub>2</sub>.

| Atom  | Site       | <i>g</i> | <i>x</i> | <i>y</i> | <i>z</i> | <i>B</i> (Å <sup>2</sup> ) |
|-------|------------|----------|----------|----------|----------|----------------------------|
| Ni(1) | <i>4a</i>  | 1        | 0        | 0        | 0        | 0.42(3)                    |
| Ni(2) | <i>8e</i>  | 1        | 0.25     | 0.125    | 0.25     | 0.58(1)                    |
| V(1)  | <i>8f</i>  | 1        | 0        | 0.4106   | 0.1213   | 0.67(3)                    |
| O(1)  | <i>8f</i>  | 1        | 0        | 0.2292   | 0.2805   | 0.45(2)                    |
| O(2)  | <i>8f</i>  | 1        | 0        | 0        | 0.2742   | 0.85(1)                    |
| O(3)  | <i>16g</i> | 1        | 0.2221   | 0.1091   | 0.8478   | 0.66(3)                    |

Figure S1

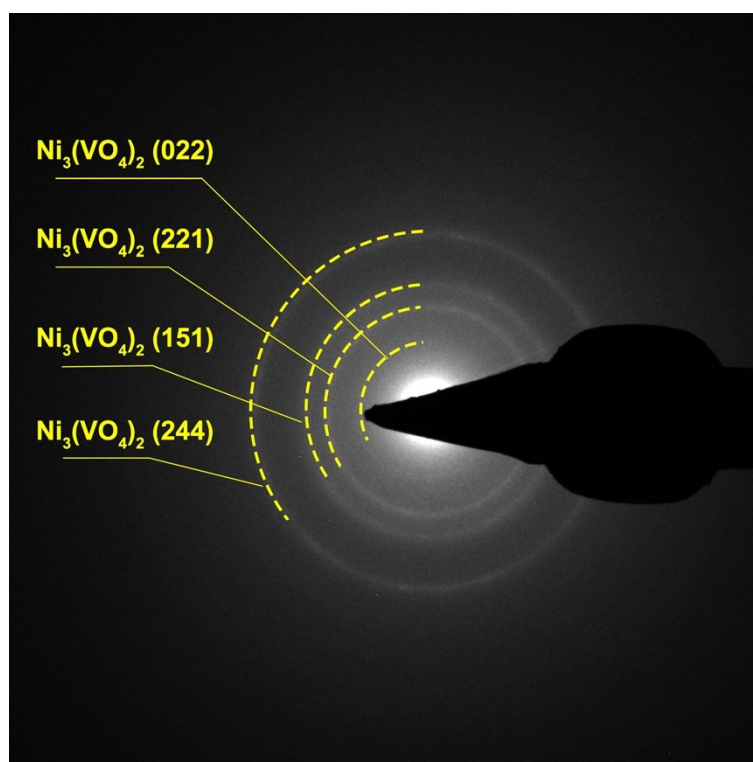

Fig.S1 Selected area electron diffraction patterns of  $\text{Ni}_3(\text{VO}_4)_2$ .

Figure S2

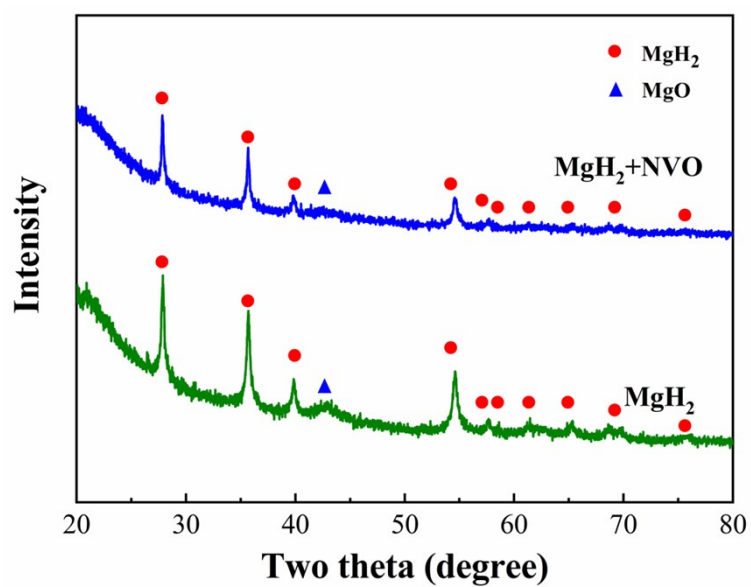

**Fig.S2** XRD patterns of MgH<sub>2</sub>-Ni<sub>3</sub>(VO<sub>4</sub>)<sub>2</sub> and pure MgH<sub>2</sub> after ball-milling.

### Van't Hoff equation

The relationship between equilibrium pressures and reaction temperatures can be described by the Van't Hoff equation:

$$\ln P_{\text{H}_2} = \frac{\Delta H}{RT} - \frac{\Delta S}{R} \quad \text{Equation S1}$$

where  $T$  is the experimental temperature,  $P$  is the equilibrium pressure, and  $R$  is the gas constant.

### Kissinger's equation

The relationship between the peak temperatures ( $T_p$ ) and the different heating rates ( $\beta$ ) is as follows:

$$\frac{d[\ln(\beta/T_p^2)]}{d(1/T_p)} = -\frac{Ea}{R} \quad \text{Equation S2}$$

where  $R$  is the gas constant.  $\ln(\beta/T_p^2)$  vs.  $1/T_p$  satisfies a linear relationship and the slope is  $-Ea/R$ .

Figure S3

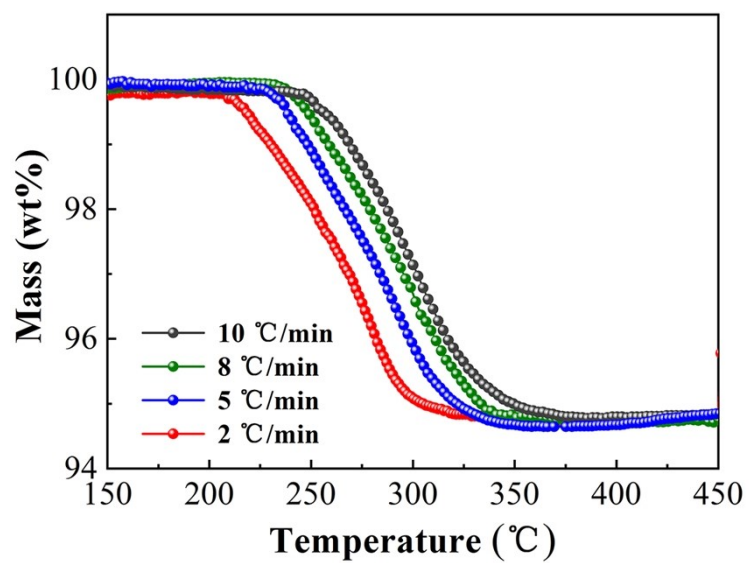

Fig.S3 TG curves of  $\text{MgH}_2\text{-Ni}_3(\text{VO}_4)_2$  sample at different heating rates.

Figure S4

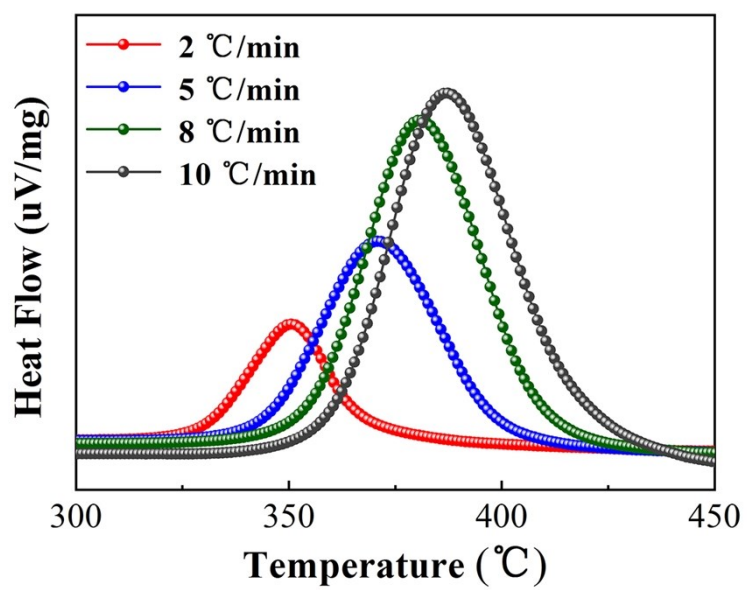

Fig.S4 DSC curves of ball-milled MgH<sub>2</sub> at different heating rates.



Figure S5

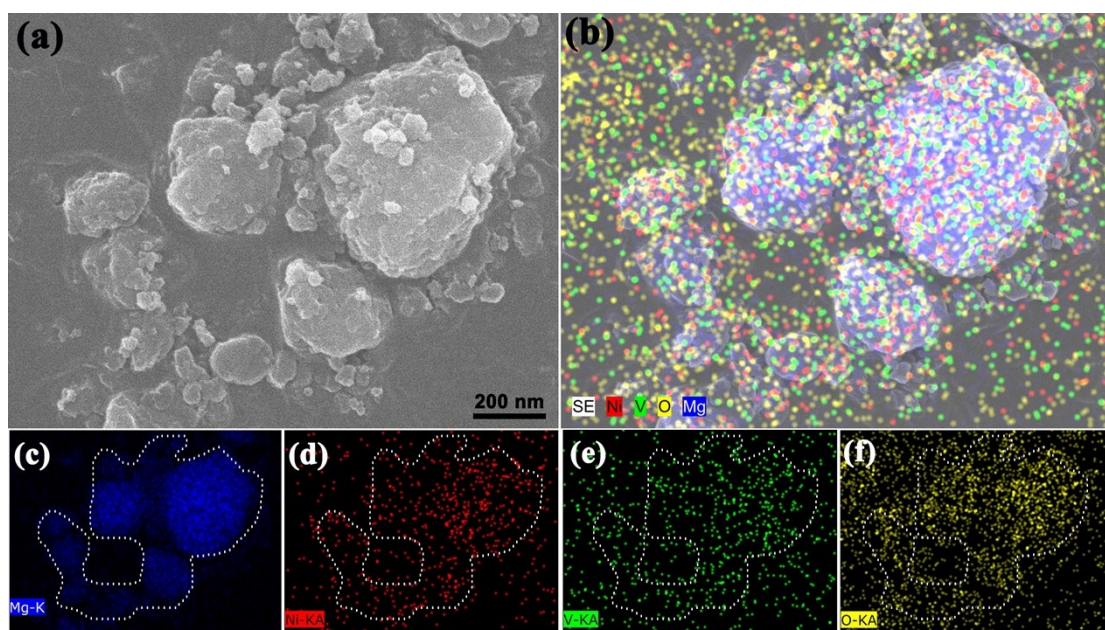

**Fig.S5** (a-b) SEM, EDS mapping of (c) Mg, (d) Ni, (e) V and (f) O for dehydrogenated  $\text{MgH}_2\text{-Ni}_3(\text{VO}_4)_2$  sample.

Figure S6

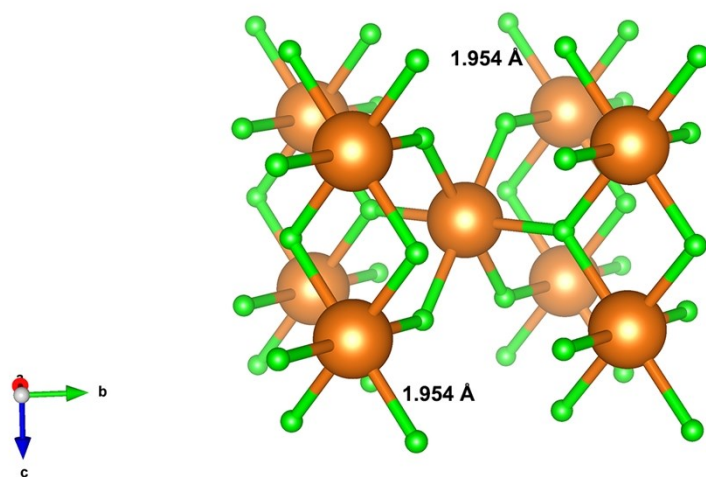

**Fig.S6** Schematic diagram of the crystal structure of MgH<sub>2</sub>.

Figure S7

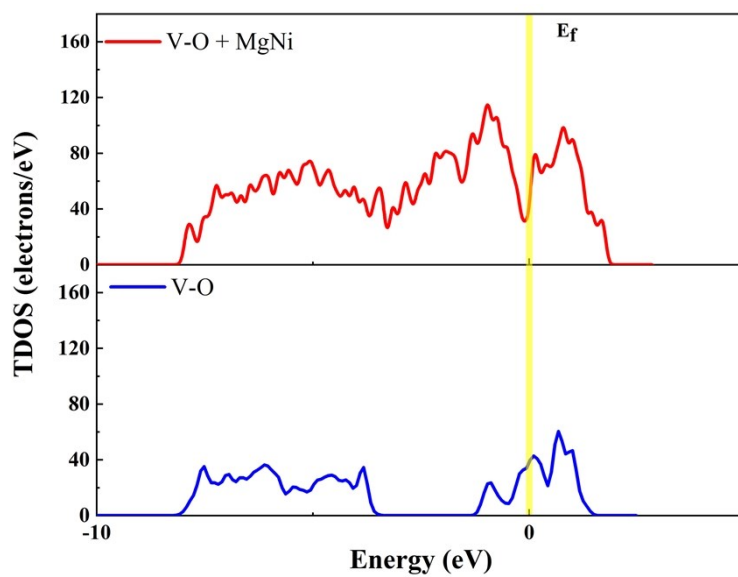

Fig.S7 DOS of  $V_2O_3$  (001) crystal plane and  $Mg_2Ni$  doped  $V_2O_3$ .
